# Supplementary material for: Effect of sodium–glucose cotransporter 2 inhibitors on cardiac structure and function in type 2 diabetes mellitus patients with or without chronic heart failure: a meta-analysis
Source: Springer Nature journal article supplement (doi:10.1186/s12933-020-01209-y), 2021-01-25

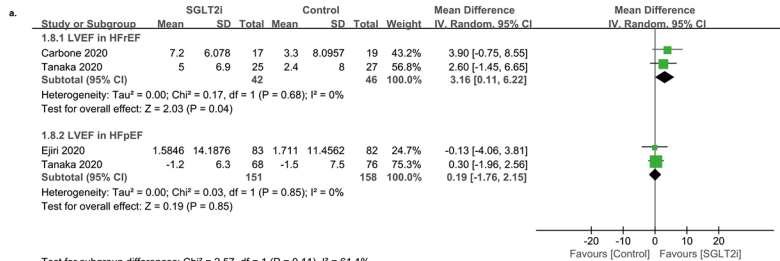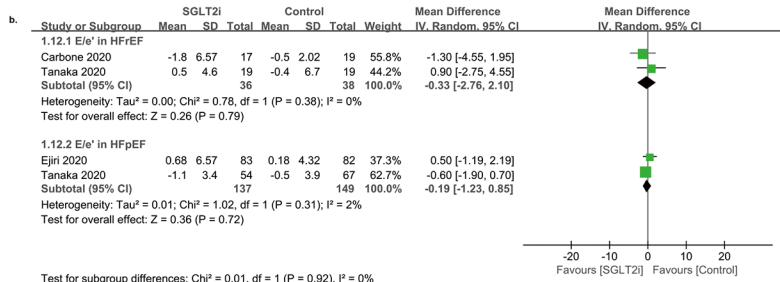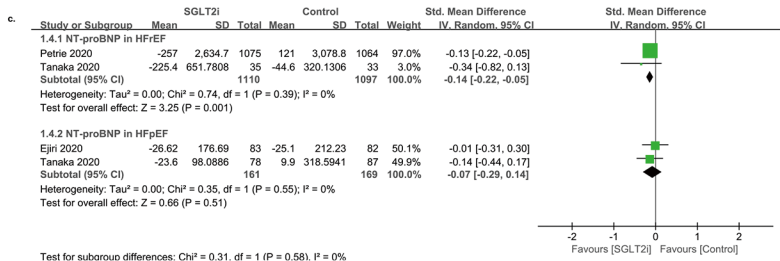

Supplement: MOESM4 [file 18798738]
